# Supplementary material for: Neurodevelopmental outcome of patients with congenital gastrointestinal malformations: a systematic review and meta-analysis
Source: HighWire-hosted journal article supplement (doi:10.1136/archdischild-2021-322158), 2021-06-10
Supplement: archdischild-2021-322158supp001_data_supplement.pdf [file archdischild-2021-322158supp001_data_supplement.pdf]

# Supplementary Material

## SEARCH STRATEGY PUBMED

("Congenital Abnormalities"[Mesh:NoExp] OR congenital abnormalit\*[tiab] OR congenital deformit\*[tiab] OR congenital defect\*[tiab] OR birth defect\*[tiab] OR congenital anomal\*[tiab] OR "Esophageal Atresia"[Mesh] OR esophageal atresia\*[tiab] OR oesophageal atresia\*[tiab] OR "Gastroschisis"[Mesh] OR gastroschis\*[tiab] OR Congenital Fissure of the Abdominal Cavity[tiab] OR ("Hernia, Umbilical"[Mesh] AND congenital\*[tiab]) OR exomphalos[tiab] OR omphalocele\*[tiab] OR "Hirschsprung Disease"[Mesh] OR hirschsprung disease[tiab] OR congenital megacolon[tiab] OR hirschsprung's disease[tiab] OR hirschsprungs disease[tiab] OR aganglionic megacolon[tiab] OR Rectosigmoid Colon Aganglionosis[tiab] OR Rectosigmoid Aganglionosis[tiab] OR Congenital Intestinal Aganglionosis[tiab] OR Colonic Aganglionosis[tiab] OR Total Colonic Aganglionosis[tiab] OR "Anorectal Malformations"[Mesh] OR Anorectal Malformation\*[tiab] OR Anorectal Anomal\*[tiab] OR Anorectal Atresia\*[tiab] OR Anorectal Stenos\*[tiab] OR "Anus, Imperforate"[Mesh] OR imperforate anus[tiab] OR anal atresi\*[tiab] OR "Short Bowel Syndrome"[Mesh] OR Short Bowel Syndrome\*[tiab] OR intestinal failure[tiab] OR pediatric intestinal failure[tiab] OR paediatric intestinal failure[tiab] OR "Intestinal Atresia"[Mesh] OR Congenital Intestinal Atresia\*[tiab] OR Apple Peel Syndrome\*[tiab] OR Apple-Peel Intestinal Atresia\*[tiab] OR Jejunal Atresia[tiab] OR Apple Peel Small Bowel Syndrome[tiab] OR Familial Apple Peel Jejunal Atresia[tiab]) AND (Infan\*[tiab] OR newborn\*[tiab] OR new-born\*[tiab] OR perinat\*[tiab] OR neonat\*[tiab] OR baby[tiab] OR baby\*[tiab] OR babies[tiab] OR toddler\*[tiab] OR minors[tiab] OR minors\*[tiab] OR boy[tiab] OR boys[tiab] OR boyfriend[tiab] OR boyhood[tiab] OR girl\*[tiab] OR kid[tiab] OR kids[tiab] OR child[tiab] OR child\*[tiab] OR children\*[tiab] OR schoolchild\*[tiab] OR schoolchild[tiab] OR school child[tiab] OR school child\*[tiab] OR adolescen\*[tiab] OR juvenil\*[tiab] OR youth\*[tiab] OR teen\*[tiab] OR under\*age\*[tiab] OR pubescen\*[tiab] OR pediatrics[mesh] OR pediatric\*[tiab] OR paediatric\*[tiab] OR peadiatric\*[tiab] OR school[tiab] OR school\*[tiab] OR prematur\* OR preterm\*) AND ("Child Development"[Mesh] OR Child Development[tiab] OR Infant Development[tiab] OR neurocogniti\*[tiab] OR neuropsych\*[tiab] OR cogniti\*[tiab] OR neurodevelopment\*[tiab] OR developmental[tiab] OR motor\*[tiab] OR movement[tiab] OR psychomotor[tiab] OR intell\*[tiab] OR intellect\*[tiab] OR intellectual[tiab] OR intelligence[tiab] OR psychomotor performanc\*[tiab] OR neurocognitive performanc\*[tiab] OR psychomotor skil\*[tiab] OR neurocognitive skil\*[tiab] OR neuropsychological funct\*[tiab] OR psychomotor funct\*[tiab] OR neuropsychological outcom\*[tiab] OR psychomotor outcom\*[tiab] OR neurocognitive outcom\*[tiab] OR "Wechsler Scales"[Mesh] OR Wechsler Scale\*[tiab] OR WPPSI[tiab] OR WISC[tiab] OR Wechsler Intelligence Scale for Children[tiab] OR Wechsler Preschool and Primary Scale of

Intelligence[tiab] OR BSID[tiab] OR Bayley[tiab] OR Bayley Scales of Infant Development[tiab] OR MABC[tiab] OR Movement Assessment Battery for Children[tiab] OR AIMS[tiab] OR Alberta Infant Motor Scale[tiab] OR Infant Motor Scale[tiab] OR BOTMP[tiab] OR Bruininks-Oseretsky[tiab] OR Bruininks\*[tiab] OR Griffiths[tiab] OR Griffiths Mental Development Scale[tiab] OR GMSD[tiab] OR Griffith score\*[tiab] OR Mullen[tiab] OR Mullen Scales of Early Learning[tiab] OR MSEL[tiab] OR Ages and stages questionnaire[tiab] OR ASQ[tiab] OR CBCL[tiab] OR Child Behavioural Checklist[tiab] OR Child Behavioral Checklist[tiab] OR NEPSY[tiab]) AND ("Case-Control Studies"[Mesh] OR "Cohort Studies"[Mesh] OR "Observational Study" [Publication Type] OR case-control[tiab] OR cohort[tiab] OR retrospective[tiab] OR prospective[tiab] OR observational stud\*[tiab] OR descriptive study[tiab] OR "Cross-Sectional Studies"[Mesh] OR cross sectional[tiab])

## **SELECTION OF STUDIES DESCRIBING OVERLAPPING COHORTS**

In case multiple articles reported on (partly) overlapping cohorts, we included the article that: (1) reported the longest follow-up period, (2) reported separately on subgroups of patients to allow differentiation for malformation type and/or (3) had the largest sample size to maximize generalizability of the sample and statistical power of meta-analysis (decisions were made in this order).

## **ADJUSTED USE OF THE NEWCASTLE OTTAWA SCALE FOR QUALITY ASSESSMENT OF INCLUDED STUDIES**

In accordance with the manual, the NOS tool was adjusted to enable quality assessment of observational cohort studies. One aspect of the scale (“demonstration that outcome of interest was not present at start of the study”) was not applicable and was therefore omitted from quality assessment. An extra point for selection was given when studies had a design with a control group instead of using normative scores.

In accordance with the Agency for Healthcare Research and Quality (AHRQ) standards, quality of studies was considered:

- ‘good’, in case of a score of 3-4 points for selection of subjects AND a score of 1-2 points for comparability of cases and controls AND a score of 2-3 points for outcome measurements
- ‘fair’, in case of a score of 2 points for selection of subjects AND a score of 1-2 points for comparability of cases and controls AND a score of 2-3 points for outcome measurements
- ‘poor’, in case of a score of 0-1 points for selection of subjects OR 0 for comparability of cases and controls OR 0-1 for outcome measurements

## REFERENC LIST OF INCLUDED STUDIES

- Aite L, Bevilacqua F, Zaccara A, et al. Short-term neurodevelopmental outcome of babies operated on for low-risk esophageal atresia: a pilot study. *Diseases of the Esophagus*. 2014;27(4):330-334.
- Beers SR, Yaworski JA, Stillely C, Ewing L, Barksdale EM. Cognitive deficits in school-aged children with severe short bowel syndrome (SBS). *Pediatrics*. 1999;104(3):770-770.
- Bevilacqua F, Morini F, Valfre L, et al. Surgical gastrointestinal anomalies including diaphragmatic hernia: Does type of anomaly affect neurodevelopmental outcome? *American journal of perinatology*. 2014;31(3):175-180.
- Bevilacqua F, Rava L, Valfre L, et al. Factors affecting short-term neurodevelopmental outcome in children operated on for major congenital anomalies. *Journal of Pediatric Surgery*. 2015;50(7):1125-1129.
- Bouman NH, Koot HM, Hazebroek FW. Long-term physical, psychological, and social functioning of children with esophageal atresia. *Journal of pediatric surgery*. 1999;34(3):399-404.
- Burnett AC, Gunn JK, Hutchinson EA, et al. Cognition and behaviour in children with congenital abdominal wall defects. *Early human development*. 2018;116:47-52.
- Chesley PM, Sanchez SE, Melzer L, et al. Neurodevelopmental and Cognitive Outcomes in Children With Intestinal Failure. *Journal of Pediatric Gastroenterology and Nutrition*. 2016;63(1):41-45.
- Costerus S, Vlot J, van Rosmalen J, Wijnen R, Weber F. Effects of Neonatal Thoracoscopic Surgery on Tissue Oxygenation: A Pilot Study on (Neuro-) Monitoring and Outcomes. *European journal of pediatric surgery*. 2019;29:166-72.
- Danzer E, Hoffman C, Miller JS, D'Agostino JA, Schindewolf EM, Gerdes M, et al. Autism spectrum disorder and neurodevelopmental delays in children with giant omphalocele. *Journal of pediatric surgery*. 2019;54:1771-7.
- Doberschuetz N, Dewitz R, Rolle U, Schlosser R, Allendorf A. Follow-Up of Children with Gastrointestinal Malformations and Postnatal Surgery and Anesthesia: Evaluation at Two Years of Age. *Neonatology*. 2016;110(1):8-13.
- Elsinga RM, Roze E, Van Braeckel KN, Hulscher JB, Bos AF. Motor and cognitive outcome at school age of children with surgically treated intestinal obstructions in the neonatal period. *Early human development*. 2013;89(3):181-185.
- Faugli A, Bjornland K, Emblem R, Novik TS, Diseth TH. Mental health and psychosocial functioning in adolescents with esophageal atresia. *Journal of pediatric surgery*. 2009;44(4):729-737.
- Gischler SJ, Mazer P, Duivenvoorden HJ, et al. Interdisciplinary structural follow-up of surgical newborns: a prospective evaluation. *Journal of pediatric surgery*. 2009;44(7):1382-1389.
- Giudici L, Bokser VS, Maricic MA, Golombek SG, Ferrario CC. Babies born with gastroschisis and followed up to the age of six years faced long-term morbidity and impairments. *Acta Paediatrica*. 2016;105(6):E275-E280.

- Giudici LB, Bokser VS, Golombek SG, Castrillon CC, Trovato M, Ferrario CC. Esophageal atresia: long-term interdisciplinary follow-up. *Journal of Pediatric and Neonatal Individualized Medicine*. 2016;5(2).
- Gorra AS, Needelman H, Azarow KS, Roberts HJ, Jackson BJ, Cusick RA. Long-term neurodevelopmental outcomes in children born with gastroschisis: the tiebreaker. *Journal of pediatric surgery*. 2012;47(1):125-129.
- Harmsen WJ, Aarsen FJ, van der Cammen-van Zijp MHM, et al. Developmental problems in patients with oesophageal atresia: A longitudinal follow-up study. *Archives of Disease in Childhood*. 2017;102: F214–F219.
- Harris EL, Hart SJ, Minutillo C, et al. The long-term neurodevelopmental and psychological outcomes of gastroschisis: A cohort study. *Journal of Pediatric Surgery*. 2016;51(4):549-553.
- Hijkoop A, H IJ, Wijnen RMH, Tibboel D, Rosmalen JV, Cohen-Overbeek TE. Prenatal markers and longitudinal follow-up in simple and complex gastroschisis. *Archives of disease in childhood Fetal and neonatal edition*. 2018;103(2):F126-F131.
- Huang J, Cai W, Tang Q, et al. Long-term cognitive functions in neonatal short bowel syndrome patients. *European Journal of Pediatric Surgery*. 2008;18(2):89-92.
- Kato T, Kanto K, Yoshino H, et al. Mental and intellectual development of neonatal surgical children in a long-term follow-up. *Journal of pediatric surgery*. 1993;28(2):123-129.
- Konig TT, Muensterer OJ. Physical Fitness and Locomotor Skills in Children With Esophageal Atresia-A Case Control Pilot Study. *Front Pediatr*. 2018;6:337.
- Kubota A, Nose K, Yamamoto E, et al. Psychosocial and cognitive consequences of major neonatal surgery. *Journal of pediatric surgery*. 2011;46(12):2250-2253.
- Kumari V, Joshi P, Dhua AK, Sapra S, Srinivas M, Agarwala S, et al. Developmental Status of Children Operated for Esophageal Atresia with or without Tracheoesophageal Fistula Along with Maternal Stress, Their Quality of life, and Coping Abilities at AIIMS, New Delhi. *European journal of pediatric surgery*. 2019;29:125-31.
- Laing SR, Walker K, Ungerer J, Badawi N, Spence K. Early development of children with major birth defects requiring newborn surgery. *Journal of Paediatrics and Child Health*. 2011;47(3):140-147.
- Ludman L, Spitz L, Lansdown R. Developmental progress of newborns undergoing neonatal surgery. *Journal of pediatric surgery*. 1990;25(5):469-471.
- Ludman L, Spitz L, Lansdown R. Intellectual development at 3 years of age of children who underwent major neonatal surgery. *Journal of pediatric surgery*. 1993;28(2):130-134.
- Maheshwari R, Trivedi A, Walker K, Holland AJ. Retrospective cohort study of long-gap oesophageal atresia. *Journal of paediatrics and child health*. 2013;49(10):845-849.
- Mawlana W, Zamiara P, Lane H, et al. Neurodevelopmental outcomes of infants with esophageal atresia and tracheoesophageal fistula. *Journal of pediatric surgery*. 2018;53(9):1651-1654.

Mazer P, Gischler SJ, MH VDC-VZ, et al. Early developmental assessment of children with major non-cardiac congenital anomalies predicts development at the age of 5 years. *Developmental medicine and child neurology*. 2010;52(12):1154-1159.

Minutillo C, Rao SC, Pirie S, McMichael J, Dickinson JE. Growth and developmental outcomes of infants with gastroschisis at one year of age: A retrospective study. *Journal of Pediatric Surgery*. 2013;48(8):1688-1696.

Moran MM, Gunn-Charlton JK, Walsh JM, Cheong JLY, Anderson PJ, Doyle LW, et al. Associations of Neonatal Noncardiac Surgery with Brain Structure and Neurodevelopment: A Prospective Case-Control Study. *The Journal of pediatrics*. 2019;212:93-101 e2

More K, Rao S, McMichael J, Minutillo C. Growth and Developmental Outcomes of Infants with Hirschsprung Disease Presenting in the Neonatal Period: A Retrospective Study. *Journal of Pediatrics*. 2014;165(1):73-+.

Newton LE, Abdessalam SF, Raynor SC, et al. Neurodevelopmental outcomes of tracheoesophageal fistulas. *Journal of Pediatric Surgery*. 2016;51(5):743-747.

Payne NR, Gilmore L, Svobodny S, et al. A cross-sectional, case-control follow-up of infants with gastroschisis. *Journal of Neonatal-Perinatal Medicine*. 2010;3(3):207-215.

Plummer EA, Wang Q, Larson-Nath CM, Scheurer JM, Ramel SE. Body composition and cognition in preschool-age children with congenital gastrointestinal anomalies. *Early human development*. 2019;129:5-10.

Sirichaipornsak S, Jirapradittha J, Kiatchoosakun P, Suphakunpinyo C. Neurodevelopmental outcomes of children with gastroschisis at university hospital in northeast Thailand. *Asian Biomedicine*. 2011;5(6):861-866.

So S, Patterson C, Gold A, et al. Early neurodevelopmental outcomes of infants with intestinal failure. *Early Human Development*. 2016;101:11-16.

So S, Patterson C, Evans C, Wales PW. Motor Proficiency and Generalized Self-Efficacy Toward Physical Activity in Children With Intestinal Failure. *Journal of pediatric gastroenterology and nutrition*. 2019;68:7-12.

So S, Patterson C, Gold A, Rogers A, Belza C, de Silva N, et al. Neurodevelopmental outcomes of infants with intestinal failure at 12 and 26 months corrected age. *Early human development*. 2019;130:38-43.

South AP, Marshall DD, Bose CL, Laughon MM. Growth and neurodevelopment at 16 to 24 months of age for infants born with gastroschisis. *Journal of Perinatology*. 2008;28(10):702-706.

van den Hondel D, Aarsen FK, Wijnen RM, Sloots CE, H IJ. Children with congenital colorectal malformations often require special education or remedial teaching, despite normal intelligence. *Acta paediatrica (Oslo, Norway : 1992)*. 2016;105(2):e77-84.

van den Hondel D, Sloots CE, Gischler SJ, Meeussen CJ, Wijnen RM, H IJ. Prospective long-term follow up of children with anorectal malformation: growth and development until 5 years of age. *Journal of pediatric surgery*. 2013;48(4):818-825.

van der Cammen-van Zijp MH, Gischler SJ, Mazer P, van Dijk M, Tibboel D, Ijsselstijn H. Motor-function and exercise capacity in children with major anatomical congenital anomalies: an evaluation at 5 years of age. *Early human development*. 2010;86(8):523-528.

van Eijck FC, van Vlimmeren LA, Wijnen RM, et al. Functional, motor developmental, and long-term outcome after the component separation technique in children with giant omphalocele: a case control study. *Journal of pediatric surgery*. 2013;48(3):525-532.

Walker K, Halliday R, Badawi N, Stewart J, Holland AJ. Early developmental outcome following surgery for oesophageal atresia. *Journal of paediatrics and child health*. 2013;49(6):467-470.

Walker K, Loughran-Fowlds A, Halliday R, et al. Developmental outcomes at 3 years of age following major non-cardiac and cardiac surgery in term infants: A population-based study. *Journal of Paediatrics and Child Health*. 2015;51(12):1221-1225.

## STUDY CHARACTERISTICS OF INCLUDED STUDIES

*sTable 1* Study characteristics of included studies

| Author           | Period of inclusion <sup>a</sup> | Country | Sample size <sup>b</sup> | Assessed type of malformation <sup>b</sup> | Tool <sup>c</sup> | Normative sample                 | Included in meta-analysis of overall neurodevelopmental outcome | Included in meta-analysis of motor outcome | Included in meta-analysis of cognitive outcome | Included in meta-analysis of language outcome | Age at assessment (months) <sup>a,d,e,f</sup> | Mean (SD) GA (wk) <sup>a,d,f</sup> | Mean (SD) BW (gram) <sup>a,d,f</sup> | Mean (SD) number of surgeries <sup>a,d,e,f</sup> | Mean (SD) length of total hospital stay <sup>a,d,e,f</sup> |
|------------------|----------------------------------|---------|--------------------------|--------------------------------------------|-------------------|----------------------------------|-----------------------------------------------------------------|--------------------------------------------|------------------------------------------------|-----------------------------------------------|-----------------------------------------------|------------------------------------|--------------------------------------|--------------------------------------------------|------------------------------------------------------------|
| Aite, 2014       | 2008-2012                        | Italy   | 30                       | EA                                         | BSID-III          | Italian norm <sup>1</sup>        | X                                                               | X                                          | X                                              |                                               | 6 / 12                                        | 38 (2)                             | 2635 (470)                           | 1.1 (0.2)/<br>1.2 (0.5)                          | NR                                                         |
| Beers, 2000      | NR                               | USA     | 8                        | SB                                         | WISC-III          | North-American norm <sup>2</sup> | X                                                               | X                                          | X                                              |                                               | 117                                           | 34 (3)                             | 19889 (826)                          | NR                                               | NR                                                         |
| Bevilacqua, 2014 | 2008-2010                        | Italy   | 150 (37 EA, 43)          | Mix                                        | BSID-III          | Italian norm <sup>1</sup>        | X                                                               | X                                          | X                                              |                                               | 6                                             | 38 (1)                             | 2944 (636)                           | 1.7 (1.5)                                        | 34.9 (23.2)                                                |



|                  |           |       |                                                           |     |          |                           |   |   |   |  |        |        |               |                             |                          |
|------------------|-----------|-------|-----------------------------------------------------------|-----|----------|---------------------------|---|---|---|--|--------|--------|---------------|-----------------------------|--------------------------|
|                  |           |       | CDH, 29<br>MM, 16<br>CAWD,<br>25 CR)                      |     |          |                           |   |   |   |  |        |        |               |                             |                          |
|                  |           |       | 156 (38<br>EA, 40<br>CDH, 35<br>MM, 17<br>CAWD,<br>26 CR) | Mix | BSID-III | Italian norm <sup>1</sup> | X | X | X |  | 12     | 38 (1) | 2935<br>(643) | 2 (1.5)                     | 40.4<br>(30.7)           |
|                  |           |       | 84 (15<br>EA, 30<br>CDH, 19<br>MM, 12<br>CAWD,<br>8 CR)   | Mix | BSID-III | Italian norm <sup>1</sup> | X | X | X |  | 24     | 38 (2) | 2853<br>(547) | 2 (1.5)                     | 40.9<br>(27.2)           |
| Bevilacqua, 2015 | 2008-2012 | Italy | 41                                                        | EA  | BSID-III | Italian norm <sup>1</sup> | X | X | X |  | 6 / 12 | 38 (2) | 2714<br>(553) | 1.4 (0.8)<br>/ 1.4<br>(0.8) | 36.8<br>(27.7) /<br>39.4 |

|                  |               |                 |    |            |             |                                         |   |   |   |   |        |        |               |                             |                                    |
|------------------|---------------|-----------------|----|------------|-------------|-----------------------------------------|---|---|---|---|--------|--------|---------------|-----------------------------|------------------------------------|
|                  |               |                 |    |            |             |                                         |   |   |   |   |        |        |               |                             | (30.7)                             |
|                  |               |                 | 34 | IA         | BSID-III    | Italian norm <sup>1</sup>               | X | X | X |   | 6 / 12 | 37 (2) | 2763<br>(667) | 2 (1.5) /<br>2 (1.5)        | 56.0<br>(49.0) /<br>55.2<br>(48.8) |
|                  |               |                 | 18 | GS, OM     | BSID-III    | Italian norm <sup>1</sup>               | X | X | X |   | 6 / 12 | 37 (2) | 2614<br>(607) | 1.4 (0.8)<br>/ 1.4<br>(0.8) | 30.4<br>(9.5) /<br>30.4<br>(9.5)   |
|                  |               |                 | 20 | HD,<br>ARM | BSID-III    | Italian norm <sup>1</sup>               | X | X | X |   | 6 / 12 | 39 (2) | 3326<br>(618) | 2.3 (1.6)<br>/ 2.4<br>(1.8) | 33.3<br>(26.1) /<br>34.5<br>(28.9) |
| Bouman,<br>1999  | NR            | Netherlan<br>ds | 36 | EA         | WISC-<br>RN | Dutch norm <sup>3</sup>                 | X |   | X |   | 122    | NR     | NR            | 3.4 (1.9)                   | NR                                 |
| Burnett,<br>2018 | 2006-<br>2014 | Australia       | 39 | GS         | BSID-III    | North-<br>American<br>norm <sup>4</sup> | X | X | X | X | 2      | 36 (2) | 2194<br>(400) | NR                          | 39.6<br>(25.4)                     |

|                |           |             |    |    |                                     |                                  |   |   |   |   |    |        |            |          |              |
|----------------|-----------|-------------|----|----|-------------------------------------|----------------------------------|---|---|---|---|----|--------|------------|----------|--------------|
|                |           |             | 20 | GS | WPPSI-III                           | North-American norm <sup>5</sup> |   |   | X |   | 72 | 35 (2) | 2304 (614) | NR       | 47.9 (41.9)  |
|                |           |             | 20 | OM | BSID-III                            | North American norm <sup>4</sup> | X | X | X | X | 24 | 39 (2) | 3351 (596) | NR       | 15.4 (14.3)  |
|                |           |             | 10 | OM | WPPSI-III                           | North American norm <sup>5</sup> |   |   | X |   | 72 | 39 (1) | 3492 (532) | NR       | 11.5 (7.7)   |
| Chesley, 2016  | NR        | USA         | 15 | SB | BSID-II                             | North American norm <sup>6</sup> | X | X | X |   | 17 | 34 (4) | NR         | 11 (5.7) | 145.9 (93.7) |
| Costerus, 2019 | 2011-2013 | Netherlands | 5  | EA | BSID-II                             | Dutch norm <sup>7</sup>          | X | X | X |   | 24 | 38 (2) | 2742 (545) | NR       | NR           |
| Danzer, 2019   | 2004-2015 | USA         | 47 | OM | BSID-II;<br>BSID-III,<br>WPPSI-III, | NR                               | X | X | X | X | 41 | 35 (3) | 2525 (735) | NR       | 132.8 (86.3) |

|                    |           |             |                                                                |     | WPPSI-IV                  |                                                 |   |   |   |  |     |        |             |           |             |
|--------------------|-----------|-------------|----------------------------------------------------------------|-----|---------------------------|-------------------------------------------------|---|---|---|--|-----|--------|-------------|-----------|-------------|
| Doberschuetz, 2016 | 2008-2011 | Germany     | 40 (9 EA, 9 GS, 5 IA, 4 OM, 3 CDH, 2 ARM, 1 HD, 3 combination) | Mix | BSID-II                   | Control group – but normative data was included | X | X | X |  | 25  | 37 (2) | 2782 (674)  | 2.0 (NR)  | 43.9 (40.3) |
| Elsinga, 2013      | 1995-2002 | Netherlands | 27                                                             | IA  | M-ABC, WISC-III, NEPSY-II | Dutch norm <sup>8,9,10</sup>                    | X | X | X |  | 114 | 36 (3) | 2972 (1091) | NR        | NR          |
| Faugli, 2009       | 1999-2002 | Norway      | 39                                                             | EA  | BSID-II                   | North American                                  | X | X | X |  | 13  | NR     | 2780 (926)  | 1.4 (0.9) | NR          |

|                   |               |                 |          |        |                | norm <sup>11</sup>       |   |   |   |   |                     |        |               |           |                                                 |
|-------------------|---------------|-----------------|----------|--------|----------------|--------------------------|---|---|---|---|---------------------|--------|---------------|-----------|-------------------------------------------------|
| Gischler,<br>2009 | 1999-<br>2003 | Netherlan<br>ds | 17       | EA     | BOS 2-<br>30   | Dutch norm <sup>12</sup> | X | X | X |   | 6 / 12 /<br>18 / 24 | 39 (3) | 2928<br>(485) | 4.4 (4.0) | 77.2<br>(78.8) /<br>79.8<br>(80.8) /<br>NR / NR |
|                   |               |                 | 34       | IA     | BOS 2-<br>30   | Dutch norm <sup>12</sup> | X | X | X |   | 6 / 12 /<br>18 / 24 | 37 (3) | 2964<br>(697) | 2 (1.5)   | 46.1<br>(44.3) /<br>49.0<br>(47.2) /<br>NR / NR |
|                   |               |                 | 19       | GS, OM | BOS 2-<br>30   | Dutch norm <sup>12</sup> | X | X | X |   | 6 / 12 /<br>18 / 24 | 39 (3) | 2744<br>(641) | 2.3 (1.6) | 48.2<br>(36.8) /<br>55.4<br>(52.9) /<br>NR / NR |
| Giudici,<br>2016  | 2003-<br>2013 | Argentini<br>a  | 27/14/13 | EA     | CATCL<br>AMS / | North<br>American        | X | X | X | X | 12 / 36 /<br>72     | 38 (2) | 2917<br>(440) | NR        | NR                                              |

|                  |               |                 |          |    |                               |                                                                                                         |   |   |   |   |                 |         |               |         |                        |
|------------------|---------------|-----------------|----------|----|-------------------------------|---------------------------------------------------------------------------------------------------------|---|---|---|---|-----------------|---------|---------------|---------|------------------------|
|                  |               |                 |          |    | PRUNA<br>PE                   | norm<br>(Catclams), <sup>13</sup><br>Argentinian<br>norm<br>(Prunape) <sup>14</sup>                     |   |   |   |   |                 |         |               |         |                        |
| Giudici,<br>2016 | 2003-<br>2014 | Argentini<br>a  | 52/34/20 | GS | CATCL<br>AMS /<br>PRUNA<br>PE | North<br>American<br>norm<br>(Catclams) <sup>13</sup><br>Argentinian<br>norm<br>(Prunape) <sup>14</sup> | X | X | X | X | 12 / 36 /<br>72 | 37 (2)  | 2403<br>(427) | NR      | NR                     |
| Gorra,<br>2012   | 2001-<br>2008 | USA             | 46       | GS | BSID-II                       | Control group<br>– but<br>normative data<br>was included                                                | X |   |   |   | 24              | 36 (NR) | 2542<br>(NR)  | NR      | 54.0 (NR)              |
| Harmsen,<br>2017 | 1999-<br>2006 | Netherlan<br>ds | 54       | EA | MABC,<br>MABC-<br>II,         | Dutch<br>norm <sup>8,15,9</sup>                                                                         | X | X | X |   | 60 / 96         | 38 (3)  | 2798<br>(816) | NR / NR | 84.6<br>(99.6) /<br>NR |

|               |           |             |    |        |                                 |                                      |   |   |   |  |         |        |            |    |    |
|---------------|-----------|-------------|----|--------|---------------------------------|--------------------------------------|---|---|---|--|---------|--------|------------|----|----|
|               |           |             |    |        | WISC-III                        |                                      |   |   |   |  |         |        |            |    |    |
| Harris, 2016  | 1992-2005 | Australia   | 39 | GS     | WPPSI-III, WISC-IV              | Australian norm <sup>5,16</sup>      | X |   | X |  | 120     | 36 (2) | 2496 (174) | NR | NR |
| Hijkoop, 2017 | 2000-2012 | Netherlands | 54 | GS     | BOS 2-30, BSID-II               | Dutch norm <sup>12,7</sup>           | X | X | X |  | 12 / 24 | 36 (2) | 2313 (NR)  | NR | NR |
| Huang, 2008   | 2005-2006 | China       | 8  | SB     | BSID-I, WPPSI-R, WISC-R, WAIS-R | North American norm <sup>17-20</sup> | X | X | X |  | 80      | 38 (1) | 3291 (377) | NR | NR |
| Kato, 1993    | 1978-1983 | Japan       | 8  | GS, OM | WISC-R                          | NR                                   | X |   | X |  | 107     | NR     | NR         | NR | NR |
|               |           |             | 6  | HD     | WISC-R                          | NR                                   | X |   | X |  | 101     | NR     | NR         | NR | NR |

|                 |               |           |    |     |              |                                         |   |   |   |   |        |        |               |           |                |
|-----------------|---------------|-----------|----|-----|--------------|-----------------------------------------|---|---|---|---|--------|--------|---------------|-----------|----------------|
|                 |               |           | 13 | ARM | WISC-R       | NR                                      | X |   | X |   | 94     | NR     | NR            | NR        | NR             |
| Konig,<br>2018  | NR            | Germany   | 12 | EA  | KTT;<br>DMT  | Control group                           | X | X |   |   | 84     | NR     | NR            | NR        | NR             |
| Kubota,<br>2011 | NR            | Japan     | 20 | EA  | WISC-<br>III | North<br>American<br>norm <sup>21</sup> | X |   | X |   | NR     | NR     | NR            | NR        | NR             |
|                 |               |           | 25 | ARM | WISC-<br>III | North<br>American<br>norm <sup>21</sup> | X |   | X |   | NR     | NR     | NR            | NR        | NR             |
| Kumari,<br>2019 | 2012-<br>2017 | India     | 32 | EA  | DASII        | Indian norm <sup>22</sup>               | X |   | X |   | 17     | 37 (3) | 2360<br>(639) | NR        | NR             |
| Laing,<br>2011  | 2002-<br>2004 | Australia | 46 | Mix | BSID-II      | North<br>American<br>norm <sup>6</sup>  | X | X | X |   | 24     | 38 (2) | 3174<br>(578) | 1.5 (0.9) | 28.0<br>(20.8) |
| Ludman,<br>1990 | 1983-<br>1984 | UK        | 30 | Mix | GMDS         | Control group                           | X | X | X | X | 12     | NR     | NR            | NR        | 52.5<br>(65.6) |
| Ludman,<br>1993 | 1983-<br>1985 | UK        | 29 | Mix | GMDS         | Control group                           | X | X | X | X | 6 / 36 | NR     | NR            | NR / NR   | NR / NR        |



|                  |           |             |     |          |                |                                  |   |   |   |   |                 |        |            |              |              |
|------------------|-----------|-------------|-----|----------|----------------|----------------------------------|---|---|---|---|-----------------|--------|------------|--------------|--------------|
| Maheshwari, 2013 | 2006-2011 | Australia   | 3   | EA       | BSID-III       | NR                               | X | X | X | X | 5-13            | NR     | NR         | NR           | NR           |
| Mawlana, 2018    | 2000-2015 | Canada      | 182 | EA (TEF) | BSID-II        | North American norm <sup>4</sup> | X | X | X | X | 24              | 37 (3) | 2589 (800) | NR           | NR           |
| Mazer, 2010      | 1999-2002 | Netherlands | 15  | EA       | BOS 2-30, MABC | Dutch norm <sup>12,8</sup>       | X | X | X |   | 6 / 12/ 24 / 60 | NR     | NR         | NR / NR / NR | NR / NR / NR |
|                  |           |             | 18  | IA,      | BOS 2-30, MABC | Dutch norm <sup>12,8</sup>       | X | X | X |   | 6 / 12/ 24 / 60 | NR     | NR         | NR / NR / NR | NR / NR / NR |
|                  |           |             | 27  | GS, OM   | BOS 2-30, MABC | Dutch norm <sup>12,8</sup>       | X | X | X |   | 6 / 12/ 24 / 60 | NR     | NR         | NR / NR / NR | NR / NR / NR |
|                  |           |             | 6   | HD       | BOS 2-30, MABC | Dutch norm <sup>12,8</sup>       | X | X | X |   | 6 / 12/ 24 / 60 | NR     | NR         | NR / NR / NR | NR / NR / NR |
|                  |           |             | 15  | ARM      | MABC, BOS 2-   | Dutch norm <sup>12,8</sup>       | X | X | X |   | 60              | NR     | NR         | NR           | NR           |

|                       |           |           |                     |          |                   |                            |   |   |   |   |    |            |            |    |             |
|-----------------------|-----------|-----------|---------------------|----------|-------------------|----------------------------|---|---|---|---|----|------------|------------|----|-------------|
|                       |           |           |                     |          | 30                |                            |   |   |   |   |    |            |            |    |             |
| Minutillo, 2013       | 1997-2010 | Australia | 67                  | GS       | GMDS              | NR                         | X |   | X |   | 12 | NR         | NR         | NR | NR          |
| Moran, 2019           | 2011-2013 | Australia | 27 (10 EA, 17 CAWD) | Mix      | BSID-III          | Control group              | X | X | X | X | 26 | 38 (32-40) | 2940 (NR)  | NR | NR          |
| More, 2014            | 2001-2010 | Australia | 31                  | HD       | GMDS              | British norm <sup>23</sup> | X |   | X |   | 12 | NR         | NR         | NR | NR          |
| Newton, 2016          | 2001-2014 | USA       | 34                  | EA (TEF) | BSID-II, BSID-III | Control group              | X |   |   |   | 35 | 35 (NR)    | 2244 (NR)  | NR | 57.7 (NR)   |
| Payne, 2010           | 1999-2007 | USA       | 57                  | GS       | BSID-III          | Control group              | X |   |   |   | 39 | 36 (NR)    | 2365 (NR)  | NR | 54.2 (42.6) |
| Plummer, 2019         | 2016-2018 | USA       | 34                  | CGIA     | NIH Toolbox       | British norm <sup>24</sup> | X |   | X | X | 56 | 38 (2)     | 3220 (690) | NR | NR          |
| Sirichaipornsak, 2011 | 2007-2008 | Thailand  | 15                  | GS       | BSID-III          | NR                         | X | X | X | X | 22 | 37 (2)     | 2289 (477) | NR | 42.4 (29.3) |

|                      |           |             |    |         |                 |                                      |   |   |   |   |               |         |             |           |               |
|----------------------|-----------|-------------|----|---------|-----------------|--------------------------------------|---|---|---|---|---------------|---------|-------------|-----------|---------------|
| So, 2016             | 2011-2013 | Canada      | 33 | SB      | AIMS, MAI       | North American norm <sup>25,26</sup> | X | X |   |   | 11            | 33 (5)  | 1877 (1031) | 2.4 (0.8) | 165.5 (99.6)  |
| So, 2019             | 2011-2013 | Canada      | 30 | SB      | MSEL            | North American norm <sup>27</sup>    | X | X | X | X | 12-15 / 26-32 | 33 (5)  | 1949 (995)  | NR / NR   | NR / NR       |
| So, 2019             | 2015-2016 | Canada      | 30 | SB      | BOT2            | North American norm <sup>28</sup>    | X | X |   |   | 84            | 35 (5)  | 2198 (848)  | 3.6 (2.3) | 198.0 (128.4) |
| South, 2008          | 2003-2005 | USA         | 17 | GS      | BSID-II         | North American norm <sup>6</sup>     | X |   |   |   | 20            | 36 (2)  | 2360 (731)  | NR        | NR            |
| Van den Hondel, 2013 | 1999-2011 | Netherlands | 37 | ARM     | RAKIT, MABC     | Dutch norm <sup>29,8</sup>           | X | X |   |   | 60            | 38 (NR) | 3010 (NR)   | 3.9 (3.5) | NR            |
| Van den Hondel, 2016 | 1999-2006 | Netherlands | 43 | HD, ARM | WISC-III, RAKIT | Dutch norm <sup>9,29</sup>           | X | X | X |   | 96            | NR      | NR          | NR        | NR            |

|                               |           |             |     |          |          |                          |   |   |   |   |    |         |            |    |             |
|-------------------------------|-----------|-------------|-----|----------|----------|--------------------------|---|---|---|---|----|---------|------------|----|-------------|
| Van der Cammen-van Zijp, 2010 | 1999-2003 | Netherlands | 29  | EA       | MABC     | Dutch norm <sup>8</sup>  | X | X |   |   | 71 | 37 (3)  | 2839 (913) | NR | 76.9 (69.3) |
|                               |           |             | 25  | IA       | MABC     | Dutch norm <sup>8</sup>  | X | X |   |   | 71 | 37 (3)  | 2747 (509) | NR | 49.4 (51.2) |
|                               |           |             | 24  | GS, OM   | MABC     | Dutch norm <sup>8</sup>  | X | X |   |   | 71 | 38 (2)  | 2702 (591) |    | 59.8 (64.5) |
| Van Eijck, 2013               | 2004-2007 | Netherlands | 8   | OM       | MABC-II  | Dutch norm <sup>15</sup> | X | X |   |   | 72 | NR      | NR         | NR | NR          |
| Walker, 2013                  | 2006-2008 | Australia   | 31  | EA (TEF) | BSID-III | Control group            | X | X | X | X | 12 | 38 (NR) | 2718 (717) | NR | 31.1 (30.7) |
| Walker, 2015                  | 2006-2008 | Australia   | 124 | Mix      | BSID-III | Control group            | X | X | X | X | 36 | NR      | NR         | NR | NR          |

<sup>a</sup>NR = not reported

<sup>b</sup>ARM = anorectal malformations; BA = biliary atresia; CGIA = Congenital Gastrointestinal Anomalies; EA = esophageal atresia; GS = gastroschisis; HD = Hirschsprungs disease; IA = intestinal atresia / midgut malformations ; NCCA = non-cardiac congenital malformations; OM = omphalocele; SB = short bowel syndrome / intestinal failure

<sup>c</sup>AIMS = Alberta Infant Motor Scales; BSID = Bayley Scales of Infant Development; CATCLAMS = cognitive adaptive test/clinical linguistic and auditory milestone scale; DASII = Developmental Assessment Scale of Indian Infants; DMT = Deutscher Motorik Test; GMDS = Griffiths Mental Development Scale; KTT = Kinderturtest; MABC = Movement Assessment Battery for Children; MELS = Mullen Early Learning Scales; PRUNAPE = prueba nacional de pesquisa, a national screening program in Argentina; RAKIT = Revisie Amsterdamse Kinder Intelligentie Test (Dutch intelligence test); WAIS = Wechsler Adult Scale of Intelligence; WPPSI = Wechsler Prechool and Primary Scale of Intelligence; WISC = Wechsler Infant Scale of Intelligence

<sup>d</sup> Reported median (range) and median (IQR) were recalculated into Mean (SD) using <http://www.math.hkbu.edu.hk/~tongt/papers/median2mean.html>

<sup>e</sup> Repeated measures are indicated by a “/” in this table.

<sup>f</sup> For all moderator variables a weighted average was calculated and included in meta-regression.

#### References to normative data

1. Bayley N. Bayley Scales of Infant and Toddler Development, 3rd Edition, Administration Manual. Florence: Giunti OS, 2010.
2. Wechsler D: Wechsler Intelligence Scale for Children (ed 3). San Antonio, TX, Psychological Corporation, 1991
3. Van Haassen PP, De Bruyn EEJ, Pijl YL, et al: WISC-R, Wechsler Intelligence Scale for Children-Revised, Dutch Translation. Lisse, The Netherlands, Swets & Zeitlinger, 1986
4. N. Bayley, Bayley Scales of Infant and Toddler Development, Third Edition (Bayley-III), San Antonio, TX, Harcourt Assessment, 2006.
5. D. Wechsler, The Wechsler Preschool and Primary Scale of Intelligence, Third Edition Australian Standardised Edition (WPPSI-III Australian), Pearson, Sydney, NSW, 2004.
6. Bayley N. Bayley Scales of Infant Development, 2nd edn. San Antonio, TX: The Psychological Corporation, 1993.
7. Ruiter SAJ, Spelberg HCL, van der Meulen BF, Nakken H. The BSIDII NL: construction, standardisation, and instrumental utility. *Neth J Psychol* 2008;64(01):15–40
8. Smits-Engelsman BCM. Movement Assessment Battery for Children. Lisse, The Netherlands: Swets & Zeitlinger; 1998.
9. Kort W, Compaan EL, Bleichrodt N, Resing WCM, Schittekatte M, Bosmans M, et al. WISC-III NL Handleiding. Amsterdam: NIP dienstencentrum; 2002.
10. Korkman M, Kirk U, Kemp SL. NEPSY II Clinical and Interpretative Manual. A Brand of Harcourt Assessments. San Antonio, TX: PsychCorp. 2007.
11. Bayley, N. (1993). Bayley scales of infant development (2nd ed.). New York: Psychological Corporation.
12. Van der Meulen BF, Smrkovsky M. De Bayley Ontwikkelings Schalen (BOS2-30). Handleiding. Lisse, the Netherlands: Swets and Zeitlinger; 1983.
13. Visintainer P, Bennett A. Standardization of capute scales. In *The Capute Scale. Cognitive Adaptive Test/Clinical Linguistic Auditory Milestone Scale (CAT/CLAMS)*, 2nd ed. Baltimore: Paul Brookes Publishing Co, 2005: 47–70.

14. Lejarraga H, Menéndez AM, Menzano E, Guerra L, Biancato S, Pianelli P, et al. PRUNAPE: screening for psychomotor development problems at primary care level. *Arch Argent Pediatr* 2008; 106: 119–25.
15. Smits Engelsman BC. Movement abc-2-nl. Dutch manual. Amsterdam: Pearson, 2010.
16. Wechsler D. Wechsler Intelligence Scale for Children - Fourth Edition Australian Standardised Edition (WISC-IV Australian). Pearson; 2005.
17. Bayley N. Manual for the Bayley Scales of Infant Development. San Antonio: The Psychological Corporation, 1969
18. Wechsler D. Manual for the Wechsler Preschool and Primary Scale of Intelligence-Revised. New York, NY: Psychological Corp., 1990
19. Wechsler D. Manual for the Wechsler Intelligence Scale for Children-Revised. New York, NY: Psychological Corp., 1974
20. Wechsler D. Manual for the Wechsler Adult Intelligence Scale-Revised (WAIS-R). New York, NY: Psychological Corp., 1981
21. Wechsler D. Wechsler Intelligence Scale for Children—Third Edition. Philadelphia, PA: The Psychological Corporation; 1991.
22. Phatak P. Manual for Using Developmental Assessment Scales for Indian Infants (DASII); Based on Revised Baroda Norms. Pune, India: Anand Agencies; 1997
23. Huntley M. The Griffiths Mental Development Scales from birth to 2 years Manual (Revision). Association for Research in Infant and Child Development; 1996.
24. J.L. Beaumont, R. Havlik, K.F. Cook, R.D. Hays, K. Wallner-Allen, S.P. Korper, et al., Norming plans for the NIH toolbox, *Neurology* 80 (Issue 11, Supplement 3) (2013) S87–S92.
25. M.C. Piper, J. D. Motor Assessment of the Developing Infant, WB Saunders, Philadelphia, 1994.
26. L.S. Chandler, M.S. A, M.W. Swanson, Movement Assessment of Infants: A Manual (Seattle, Washington) 1980.
27. E.M. Mullen, Mullen Scales of Early Learning Item Administration Book, A ed., NCS, Pearson, 1995.
28. Bruininks RH, Bruininks BD. BOT2 Bruininks-Oseretsky Test of Motor Proficiency. 2nd ed. Circle Pines, MN: AGS Publishing; 2005.
29. Bleichrodt N, Drenth PJD, Zaal JN, et al. Revisie Amsterdamse Kinder Intelligentie Test. Instructie, normen, psychometrische gegevens. Amsterdam: Pearson; 1984.

## SAMPLE DESCRIPTION

Seventeen studies reported on a cohort of patients with one single malformation, whereas most studies reported on multiple subgroups of different malformations (30 studies), together resulting in a total of 62 cohorts: esophageal atresia (17 cohorts, n=603 patients), congenital abdominal wall defects (18 cohorts, n=585 patients), followed by colorectal malformations (10 cohorts, n=172 patients), intestinal atresia (5 cohorts, n=131 patients) and intestinal failure (4 cohorts, n=102 patients) and a combination of different congenital malformations (8 cohorts, n=486 patients). Neurodevelopmental outcomes in infants or toddlers (up to 36 months of age) were described in 29 studies (n=1,768 patients), whereas in 21 studies (n=794 patients) neurodevelopmental outcomes of children (up to a maximum age of 13 years) were described. Mean birthweight of patients ranged from 1,980 to 3,492 grams, with 13 studies reporting on cohorts with a mean birthweight < 2500 grams. Mean gestational age of patients ranged from 34 to 39 weeks, with 22 studies reporting on cohorts with a mean gestational age below 37 weeks. The mean proportion of males represented was 55% (ranging from 29% to 80%).

## RESULTS OF META-REGRESSION ANALYSES

The following potential moderating factors were assessed in the current meta-analysis: mean age at neurodevelopmental testing, mean gestational age, mean birthweight, sex, comorbidity, growth impairment, neurological complications, age at primary surgery, number of surgeries, number of anesthetic exposures, length of total hospital stay, mean days of mechanical ventilation, mean days of parental nutrition, educational level of parents and socio-economic status of parents.

*sTable 2* Moderating effects of studies' effect sizes of studies' mean age, mean gestational age, mean birthweight and proportion of males on overall neurodevelopmental outcomes, cognitive outcomes and motor outcomes

|  | Overall neurodevelopmental outcomes |              | Cognitive outcomes |             | Motor outcomes |             | Language outcomes <sup>b</sup> |
|--|-------------------------------------|--------------|--------------------|-------------|----------------|-------------|--------------------------------|
|  | Number                              | Significance | Number             | Statistical | Number         | Statistical |                                |
|  |                                     |              |                    |             |                |             |                                |

|                                                                                               | <i>of patients</i> | <i>effect in meta-regression</i> | <i>of patients</i> | <i>effect in meta-regression</i> | <i>of patients</i> | <i>effect in meta-regression</i> |    |
|-----------------------------------------------------------------------------------------------|--------------------|----------------------------------|--------------------|----------------------------------|--------------------|----------------------------------|----|
| Mean age at testing in months                                                                 | <i>n</i> =1182     | <i>p</i> =0.43                   | <i>n</i> =847      | <i>p</i> =0.29                   | <i>n</i> =880      | <i>p</i> =0.94                   | NA |
| Mean gestational age in weeks                                                                 | <i>n</i> =1260     | <i>p</i> =0.07                   | <i>n</i> =1155     | <i>p</i> =0.12                   | <i>n</i> =1014     | <i>p</i> =0.10                   | NA |
| Mean birthweight in grams                                                                     | <i>n</i> =1255     | <i>p</i> =0.08                   | <i>n</i> =1194     | <i>p</i> =0.07                   | <i>n</i> =1009     | <i>p</i> =0.45                   | NA |
| Sex <sup>a</sup>                                                                              | <i>n</i> =790      | <i>p</i> =0.24                   | <i>n</i> =608      | <i>p</i> =0.20                   | <i>n</i> =545      | <i>p</i> =0.45                   | NA |
| Mean total length of hospital stay in days                                                    | <i>n</i> =1098     | <i>p</i> <0.001                  | <i>n</i> =931      | <i>p</i> =0.24                   | <i>n</i> =817      | <i>p</i> =0.008                  | NA |
| Mean number of surgeries                                                                      | <i>n</i> =983      | <i>P</i> =0.003                  | <i>n</i> =920      | <i>p</i> =0.04                   | <i>n</i> =834      | <i>p</i> =0.001                  | NA |
| a. Sex was expressed as the percentage of male subjects in each cohort<br>b. NA= not assessed |                    |                                  |                    |                                  |                    |                                  |    |



*sTable 3 Potential moderating factors not assessed in meta-regression*

| Author     | Comorbidity                                                  | Growth                                                                                       | Times exposure to anesthesia              | Age at 1st surgery in days                               | Neurologic complications         | Feeding                                     | Ventilation                                                                            | Parental education                                                                                   | Parental SES                                                                                     |
|------------|--------------------------------------------------------------|----------------------------------------------------------------------------------------------|-------------------------------------------|----------------------------------------------------------|----------------------------------|---------------------------------------------|----------------------------------------------------------------------------------------|------------------------------------------------------------------------------------------------------|--------------------------------------------------------------------------------------------------|
| Aite       |                                                              | <i>n (%) weight &lt;5th percentile</i>                                                       |                                           |                                                          |                                  |                                             | <i>Median (range) number of days ventilation</i>                                       | <i>n (%) by categories (below high school, high school, degree) by type of parent</i>                | <i>n (%) by categories (salaried, intermediate, working class, unemployed) by type of parent</i> |
| Beers      |                                                              | <i>n by categories of percentile weight scores (&lt;5th, 5-10th, 10-25th, 25-50th, 75th)</i> |                                           |                                                          |                                  |                                             |                                                                                        |                                                                                                      |                                                                                                  |
| Bevilacqua | <i>n (%) associated malformations (1, more than 1)</i>       |                                                                                              |                                           |                                                          |                                  |                                             |                                                                                        | <i>n (%) by categories (primary school, secondary school, high school, degree) by type of parent</i> |                                                                                                  |
| Bevilacqua | <i>n (%) associated malformations (none, 1, more than 1)</i> |                                                                                              | <i>Median (IQR) by follow-up duration</i> |                                                          | <i>n intracranial hemorrhage</i> | <i>n (%) medical appliances for feeding</i> | <i>median (IQR) ventilatory time in hours n (%) medical appliances for respiratory</i> | <i>n by categories (primary school, secondary school, high school, degree) by type of parent</i>     | <i>n by categories (class 1-4) by type of parent</i>                                             |
| Bouman     |                                                              |                                                                                              |                                           |                                                          |                                  |                                             | <i>Proportion assisted ventilation</i>                                                 |                                                                                                      | <i>Categorical (mid, low, high) by type of parent</i>                                            |
| Burnett    | <i>n (%) chromosomal abnormality</i>                         | <i>n (%) small for gestational age at birth (&lt;10th)</i>                                   |                                           | <i>Median (IQR) in days by type malformation and age</i> |                                  | <i>n (%) discharged with tube feeding</i>   |                                                                                        | <i>n (%) low maternal education</i>                                                                  | <i>n (%) receiving government assistance</i>                                                     |

| Author       | Comorbidity                            | Growth               | Times exposure to anesthesia          | Age at 1st surgery in days    | Neurologic complications         | Feeding                                                                                                     | Ventilation                                                                                                      | Parental education                                                       | Parental SES                                                                                                |
|--------------|----------------------------------------|----------------------|---------------------------------------|-------------------------------|----------------------------------|-------------------------------------------------------------------------------------------------------------|------------------------------------------------------------------------------------------------------------------|--------------------------------------------------------------------------|-------------------------------------------------------------------------------------------------------------|
| Chesley      |                                        |                      |                                       |                               | <i>n with cerebral palsy</i>     | <i>n with TPN; Median (range) number of days exposed to PN</i>                                              |                                                                                                                  |                                                                          |                                                                                                             |
| Costerus     | <i>n with comorbidity</i>              |                      |                                       | <i>Median (range) in days</i> |                                  |                                                                                                             | <i>Median (range) number of days ventilation</i>                                                                 |                                                                          |                                                                                                             |
| Danzer       |                                        |                      |                                       | <i>Median (range) in days</i> |                                  | <i>Mean (SD) age at initial feeding</i>                                                                     | <i>Median (range) number of days ventilation</i>                                                                 | <i>n (%) maternal education by categories (none, parttime, fulltime)</i> | <i>n (%) maternal education by categories (high school, partly college/college degree, graduate degree)</i> |
| Doberschuetz | <i>n (%) combined malformations</i>    |                      | <i>Mean (95%CI) duration in hours</i> | <i>Mean (95%CI) in hours</i>  | <i>n with hearing impairment</i> | <i>Mean (SD) / median (range) number of days PN, Mean (SD) / Median (range) number of days tube feeding</i> | <i>Mean (SD) / median ((range) number of hours ventilation, Mean (SD) / Median (range) number of days oxygen</i> |                                                                          | <i>mean score (low, medium, high)</i>                                                                       |
| Elsinga      | <i>n (%) late onset sepsis or BPD</i>  | <i>median weight</i> |                                       | <i>Median (range) in days</i> |                                  |                                                                                                             |                                                                                                                  |                                                                          |                                                                                                             |
| Faugli       | <i>n with associated malformations</i> |                      |                                       |                               |                                  | <i>n (%) with feeding difficulties</i>                                                                      | <i>n (%) assisted ventilation</i>                                                                                | <i>median (range) number of years of maternal education</i>              |                                                                                                             |

| Author   | Comorbidity                                                                                                               | Growth                                  | Times exposure to anesthesia                                                  | Age at 1st surgery in days | Neurologic complications                                            | Feeding                                                 | Ventilation                                                           | Parental education | Parental SES                                   |
|----------|---------------------------------------------------------------------------------------------------------------------------|-----------------------------------------|-------------------------------------------------------------------------------|----------------------------|---------------------------------------------------------------------|---------------------------------------------------------|-----------------------------------------------------------------------|--------------------|------------------------------------------------|
| Gischler | <i>n (%) additional medical problems, n (%) septic complications, n (%) , median (IQR) number of congenital anomalies</i> |                                         |                                                                               |                            | <i>n (%) neurologic complications</i>                               | <i>n (%) NG tube at home, n (%) enterostomy at home</i> | <i>n (%) tracheostomy, n (%) oxygen at home</i>                       |                    | <i>n (%) by categories (low, middle, high)</i> |
| Giudici  |                                                                                                                           | <i>n (%) weight &lt;10th percentile</i> |                                                                               |                            | <i>n with cerebral palsy; n with hearing loss</i>                   | <i>Mean (SD) / Median (IQR) number of days PN</i>       | <i>Mean (Sd) and median (IQR) number of days assisted ventilation</i> |                    |                                                |
| Giudici  |                                                                                                                           | <i>n (%) weight &lt;10th percentile</i> |                                                                               |                            | <i>n with cerebral palsy; n with hearing loss</i>                   | <i>Mean (SD) / Median (IQR) number of days PN</i>       | <i>Mean (Sd) and median (IQR) number of days assisted ventilation</i> |                    |                                                |
| Gorra    |                                                                                                                           |                                         |                                                                               |                            |                                                                     |                                                         |                                                                       |                    |                                                |
| Harmsen  | <i>n (%) sepsis; n (%) vacterl-association; n (%) cardiac anomaly</i>                                                     |                                         | <i>Median (range) in hours, median (range) number of anesthetic exposures</i> |                            |                                                                     | <i>Median (range) number of days PN</i>                 | <i>Median (range) number of days ventilation</i>                      |                    | <i>n (%) by categories (low, middle, high)</i> |
| Harris   |                                                                                                                           |                                         |                                                                               |                            | <i>n with amblyopia; n with cerebral palsy; n with hearing loss</i> |                                                         |                                                                       |                    |                                                |

| Author    | Comorbidity                                                     | Growth                                     | Times exposure to anesthesia            | Age at 1st surgery in days     | Neurologic complications       | Feeding                                                                                   | Ventilation                                                            | Parental education                                                                                                        | Parental SES                                                                              |
|-----------|-----------------------------------------------------------------|--------------------------------------------|-----------------------------------------|--------------------------------|--------------------------------|-------------------------------------------------------------------------------------------|------------------------------------------------------------------------|---------------------------------------------------------------------------------------------------------------------------|-------------------------------------------------------------------------------------------|
| Hijkoop   | <i>n (%) multiple congenital anomalies, n (%) complications</i> | <i>n (%) SGA at birth</i>                  | <i>Median (IQR) procedures under GA</i> |                                |                                | <i>n (%) with intestinal failure; Median (IQR) number of days to full enteral feeding</i> | <i>Median (IQR) number of days ventilation by type of malformation</i> |                                                                                                                           | <i>median (IQR) maternal SES score, n (%) low maternal SES score</i>                      |
| Huang     |                                                                 | <i>weight for age Z-score per subject</i>  |                                         | <i>age in days per subject</i> |                                | <i>Duration of PN in days per subject</i>                                                 |                                                                        |                                                                                                                           |                                                                                           |
| Kato      |                                                                 |                                            |                                         |                                |                                |                                                                                           |                                                                        |                                                                                                                           |                                                                                           |
| Konig     |                                                                 | <i>n (%) weight for age Z-score &lt; 2</i> |                                         |                                |                                |                                                                                           |                                                                        |                                                                                                                           |                                                                                           |
| Kubota    |                                                                 |                                            |                                         |                                |                                |                                                                                           |                                                                        |                                                                                                                           |                                                                                           |
| Kumari    | <i>n (%) associated congenital anomalies</i>                    | <i>n (%) -3SD weight for age</i>           |                                         |                                |                                |                                                                                           | <i>n (%) on mechanical ventilation</i>                                 | <i>n (%) graduated mothers</i>                                                                                            | <i>n (%) homemakers and monthly family income</i>                                         |
| Laing     |                                                                 |                                            |                                         | <i>Median (IQR) in days</i>    | <i>n (%) with microcephaly</i> |                                                                                           | <i>Median (IQR) hours assisted ventilation</i>                         | <i>n (%) by categories (&lt;12y schooling, &gt;12y, tertiary or further, bachelor or higher degree) by type of parent</i> | <i>n (%) occupation father (skilled, unskilled, associate professional, professional)</i> |
| Ludman    |                                                                 |                                            |                                         |                                |                                |                                                                                           | <i>n (%) assisted ventilation &gt;4 days</i>                           |                                                                                                                           | <i>n (%) by categories (manual, non-manual, single mom)</i>                               |
| Ludman    |                                                                 |                                            |                                         |                                |                                |                                                                                           |                                                                        |                                                                                                                           |                                                                                           |
| Maheswari |                                                                 |                                            |                                         |                                |                                |                                                                                           |                                                                        |                                                                                                                           |                                                                                           |

| Author         | Comorbidity                                                                                   | Growth                                  | Times exposure to anesthesia | Age at 1st surgery in days      | Neurologic complications | Feeding                                                                                     | Ventilation                                                                                  | Parental education                                  | Parental SES                    |
|----------------|-----------------------------------------------------------------------------------------------|-----------------------------------------|------------------------------|---------------------------------|--------------------------|---------------------------------------------------------------------------------------------|----------------------------------------------------------------------------------------------|-----------------------------------------------------|---------------------------------|
| Mawlana        | <i>n (%) VACTERL, n (%) associated anomalies, n (%) chromosomal anomalies</i>                 | <i>n (%) weight &lt;10th percentile</i> |                              |                                 |                          | <i>n (%) with gastrostomy</i>                                                               |                                                                                              |                                                     |                                 |
| Mazer          | <i>Median (IQR) number of congenital anomalies, n (%) syndromal / chromosomal abnormality</i> |                                         |                              |                                 |                          | <i>Median (IQR) medical appliances (O2 or tracheostomy) at discharge</i>                    | <i>Median (IQR) medical appliances (NG tube or enterostomy) at discharge</i>                 |                                                     |                                 |
| Minutillo      |                                                                                               |                                         |                              |                                 |                          |                                                                                             |                                                                                              |                                                     |                                 |
| Moran          |                                                                                               |                                         |                              |                                 | <i>MRI abnormalities</i> |                                                                                             |                                                                                              | <i>n (%) maternal tertiary education</i>            | <i>n (%) higher social risk</i> |
| More           |                                                                                               |                                         |                              | <i>Median (IQR) age in days</i> |                          |                                                                                             |                                                                                              |                                                     |                                 |
| Newton         |                                                                                               |                                         |                              |                                 |                          |                                                                                             | <i>Mean days on ventilator</i>                                                               |                                                     |                                 |
| Payne          |                                                                                               | <i>% weight &lt;10th percentile</i>     |                              |                                 |                          | <i>n (%) all per oris feeding at discharge</i>                                              | <i>Mean (SD) ventilator days</i>                                                             |                                                     | <i>n (%) single mother</i>      |
| Plummer        |                                                                                               | <i>weight for age z score</i>           |                              |                                 |                          | <i>Median (IQR) number of days PN; Percentage PN &lt; &gt;7days; Percentage gastrostomy</i> | <i>Median (IQR) days of assisted ventilation; Percentage &gt;2 days assisted ventilation</i> | <i>n (%) maternal education (college or higher)</i> |                                 |
| Sirichaiponsak |                                                                                               |                                         |                              |                                 |                          |                                                                                             |                                                                                              |                                                     |                                 |

| Author | Comorbidity | Growth                              | Times exposure to anesthesia | Age at 1st surgery in days | Neurologic complications                                                                             | Feeding                                                                                                                                                       | Ventilation                                          | Parental education | Parental SES |
|--------|-------------|-------------------------------------|------------------------------|----------------------------|------------------------------------------------------------------------------------------------------|---------------------------------------------------------------------------------------------------------------------------------------------------------------|------------------------------------------------------|--------------------|--------------|
| So     |             |                                     |                              |                            | <i>n with cerebral palsy</i>                                                                         | <i>Median (IQR) number of days PN first year; Percentage patients 100% full enteral feeding first year</i>                                                    |                                                      |                    |              |
| So     |             | <i>weight for age Z-score</i>       |                              |                            | <i>n with microcephaly</i>                                                                           | <i>Median (IQR) number of days PN; % PN dependance at follow-up; % enterostomy</i>                                                                            |                                                      |                    |              |
| So     |             |                                     |                              |                            | <i>n with CNS comorbidity; n with cerebral palsy; n with hearing loss; n with visual comorbidity</i> | <i>Median (IQR) number of days PN first year/ first two years; n (% PN at follow-up of two years; n (%) 100% full enteral feeds at follow-up of two years</i> |                                                      |                    |              |
| South  |             | <i>% weight &lt;10th percentile</i> |                              |                            | <i>n (%) abnormal neurological exam</i>                                                              | <i>Mean (SD) number of days to full enteral feedings; mean (sd) number of days PN</i>                                                                         | <i>Mean (SD) number of days assisted ventilation</i> |                    |              |

| <b>Author</b>                                               | <b>Comorbidity</b>                                                                          | <b>Growth</b>                                   | <b>Times exposure to anesthesia</b>                                             | <b>Age at 1st surgery in days</b> | <b>Neurologic complications</b>     | <b>Feeding</b>                            | <b>Ventilation</b>                                         | <b>Parental education</b>           | <b>Parental SES</b>                                                    |
|-------------------------------------------------------------|---------------------------------------------------------------------------------------------|-------------------------------------------------|---------------------------------------------------------------------------------|-----------------------------------|-------------------------------------|-------------------------------------------|------------------------------------------------------------|-------------------------------------|------------------------------------------------------------------------|
| Van den Hondel 2013                                         | <i>n (%) at least 1 major associated anomaly; n with suspected (not diagnosed) syndrome</i> | <i>n (%) Small for gestational age at birth</i> |                                                                                 |                                   |                                     | <i>n (%) gastrostomy</i>                  |                                                            |                                     |                                                                        |
| Van den Hondel                                              | <i>n (%) major comorbidity present</i>                                                      |                                                 | <i>Median (IQR) by type of malformation; Median (IQR) by follow-up duration</i> |                                   |                                     |                                           |                                                            |                                     | <i>n (%) by categories (low, middle, high) by type of malformation</i> |
| Van der Cammen-van Zijp                                     | <i>n (%) associated malformations</i>                                                       | <i>n (%) Small for gestational age at birth</i> |                                                                                 |                                   |                                     |                                           | <i>Median (range) days ventilation support, n (%) ECMO</i> |                                     |                                                                        |
| Van Eijck                                                   | <i>n with congenital tethered spinal cord syndrome</i>                                      |                                                 |                                                                                 |                                   |                                     |                                           |                                                            |                                     |                                                                        |
| Walker                                                      | <i>n (%) of associated malformations</i>                                                    |                                                 |                                                                                 |                                   |                                     |                                           |                                                            |                                     |                                                                        |
| Walker                                                      |                                                                                             |                                                 |                                                                                 |                                   |                                     |                                           |                                                            |                                     |                                                                        |
| <b>Reason for exclusion from univariate meta regression</b> | <b>Heterogeneity of definitions</b>                                                         | <b>Heterogeneity of definitions</b>             | <b>Not enough studies</b>                                                       | <b>Not enough studies</b>         | <b>Heterogeneity of definitions</b> | <b>Too biased by type of malformation</b> | <b>Too biased by type of malformation</b>                  | <b>Heterogeneity of definitions</b> | <b>Heterogeneity of definitions</b>                                    |

## RESULTS OF SUBGROUP ANALYSES ON TYPE OF MALFORMATION

Motor outcomes were significantly different across subgroups of malformations ( $Q=11.704$ ,  $p=0.020$ ). Cognitive ( $Q=3.798$ ,  $p=0.434$ ) and language outcomes ( $Q=0.589$ ,  $p=0.745$ ) did not significantly differ across different types of malformations.

Further analyses showed that patients with short bowel syndrome had significantly worse motor outcomes compared to all remaining patient groups ( $d=-1.062$  and  $d=-0.474$ ,  $Q=7.682$ ;  $p=0.006$ ), but comparable cognitive outcomes ( $d=-0.241$  and  $d=-0.432$ ,  $Q=2.875$ ;  $p=0.09$ ) and language outcomes ( $d=-0.692$  and  $d=-0.598$ ,  $Q=0.038$ ;  $p=0.85$ ).

## RESULTS OF SENSITIVITY ANALYSIS OF STUDIES OF GOOD QUALITY

Effect sizes for overall neurocognitive outcomes and cognitive outcomes differed between studies of different quality ratings ( $Q=21.46$ ,  $p<0.001$  and  $Q=45.53$ ,  $p<0.001$ , respectively). Sensitivity analysis on studies of good quality ( $n=36$ ), showed that the reported meta-analytic findings (impairments) were replicated for overall neurodevelopmental outcomes ( $d=-0.371$ , 95%CI:  $-0.462 - 0.280$ ,  $p<0.001$ ), cognitive outcomes ( $d=-0.281$ , 95%CI:  $-0.363 - -0.199$ ,  $p<0.001$ ), motor outcomes ( $d=-.0568$ , 95%CI:  $-0.738 - -0.398$ ,  $p<0.001$ ) and language outcomes ( $d=-0.570$ , 95%CI:  $-0.865 - -0.274$ ,  $p<0.001$ ).



### RISK OF BIAS ANALYSIS

*sFigure1* Funnelplot of overall neurodevelopmental outcomes

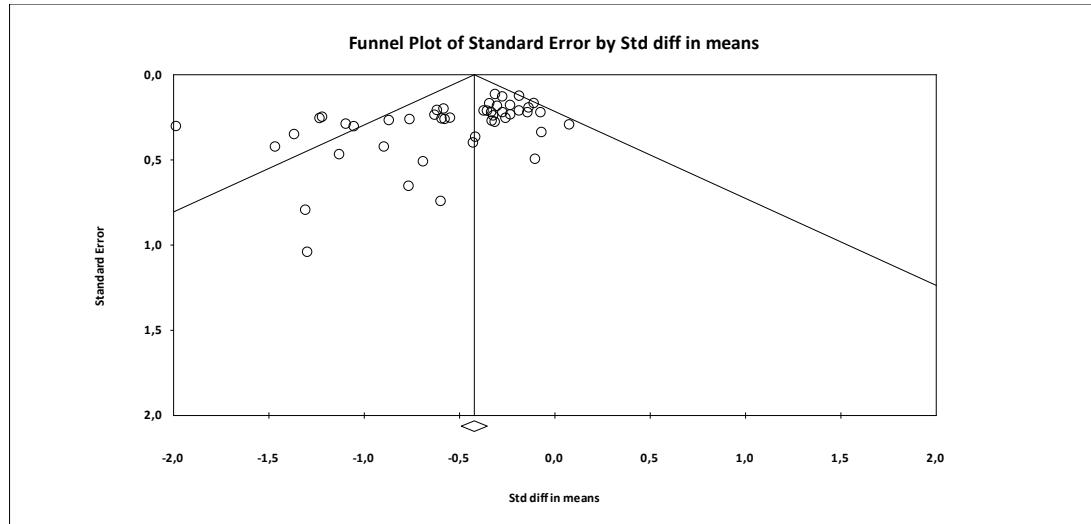

*sFigure2* Funnelplot of cognitive outcomes

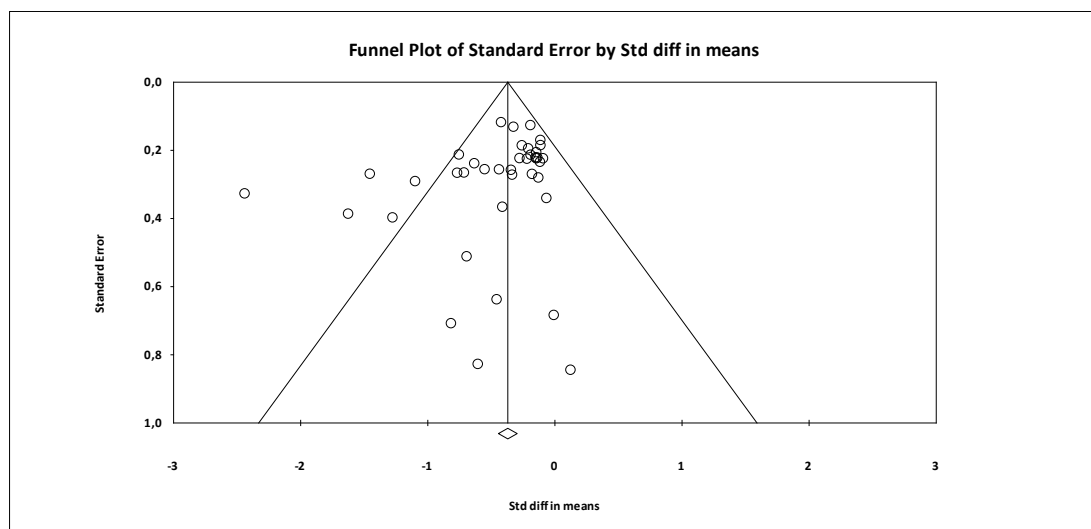

*sFigure 3* Funnelplot of motor outcomes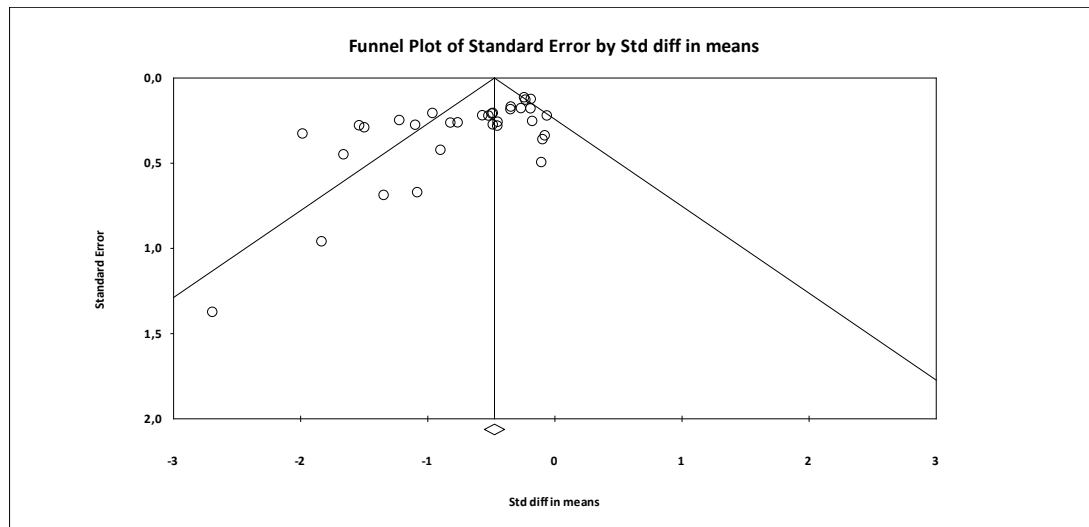*sFigure 4* Funnelplot of language outcomes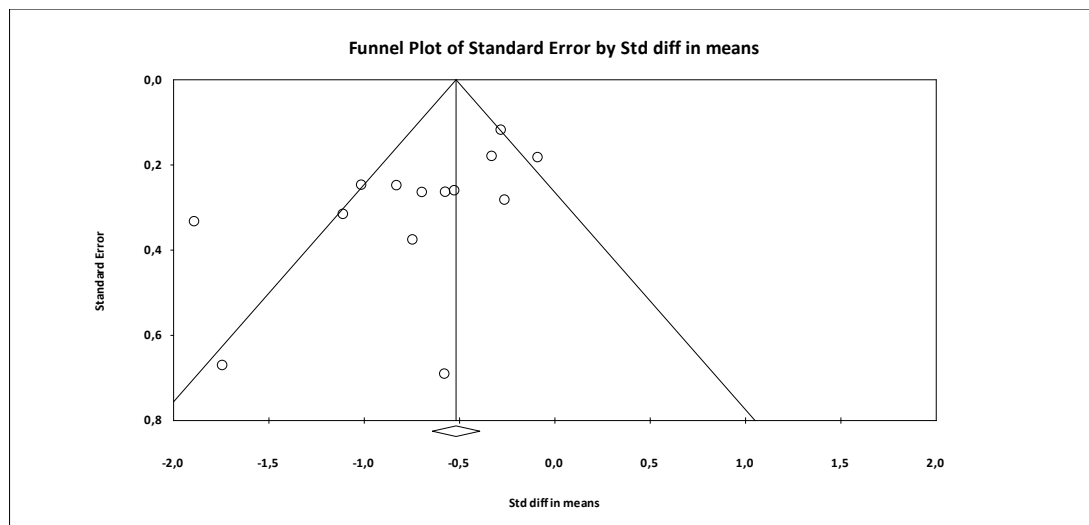

All funnel plots were symmetric on visual inspection and showed no asymmetry. However, Egger's regression showed significant risk of publication bias for all meta-analyses. Risk of potential assessment bias was found for (a) 39 of the 47 studies because these studies compared patient data with normative data standardized for age only, leaving other potentially confounding factors uncontrolled, and (b) 22 of the 47 studies because of loss to follow-up of more than 70% of the participants which may lead to a potential bias either due to loss of high-functioning patients or due to loss of severely impaired patients with co-morbidity and subsequent higher mortality.

**PRISMA CHECKLIST**

| Section/topic                      | #  | Checklist item                                                                                                                                                                                                                                                                                              | Reported on page #                                     |
|------------------------------------|----|-------------------------------------------------------------------------------------------------------------------------------------------------------------------------------------------------------------------------------------------------------------------------------------------------------------|--------------------------------------------------------|
| <b>TITLE</b>                       |    |                                                                                                                                                                                                                                                                                                             |                                                        |
| Title                              | 1  | Identify the report as a systematic review, meta-analysis, or both.                                                                                                                                                                                                                                         | 1                                                      |
| <b>ABSTRACT</b>                    |    |                                                                                                                                                                                                                                                                                                             |                                                        |
| Structured summary                 | 2  | Provide a structured summary including, as applicable: background; objectives; data sources; study eligibility criteria, participants, and interventions; study appraisal and synthesis methods; results; limitations; conclusions and implications of key findings; systematic review registration number. | 2-3                                                    |
| <b>INTRODUCTION</b>                |    |                                                                                                                                                                                                                                                                                                             |                                                        |
| Rationale                          | 3  | Describe the rationale for the review in the context of what is already known.                                                                                                                                                                                                                              | 4-5                                                    |
| Objectives                         | 4  | Provide an explicit statement of questions being addressed with reference to participants, interventions, comparisons, outcomes, and study design (PICOS).                                                                                                                                                  | 5                                                      |
| <b>METHODS</b>                     |    |                                                                                                                                                                                                                                                                                                             |                                                        |
| Protocol and registration          | 5  | Indicate if a review protocol exists, if and where it can be accessed (e.g., Web address), and, if available, provide registration information including registration number.                                                                                                                               | N/A.<br>The study protocol can be provided by authors. |
| Eligibility criteria               | 6  | Specify study characteristics (e.g., PICOS, length of follow-up) and report characteristics (e.g., years considered, language, publication status) used as criteria for eligibility, giving rationale.                                                                                                      | 5-6, see Search and Selection                          |
| Information sources                | 7  | Describe all information sources (e.g., databases with dates of coverage, contact with study authors to identify additional studies) in the search and date last searched.                                                                                                                                  | 5, see Search and Selection                            |
| Search                             | 8  | Present full electronic search strategy for at least one database, including any limits used, such that it could be repeated.                                                                                                                                                                               | Supplementary Material.                                |
| Study selection                    | 9  | State the process for selecting studies (i.e., screening, eligibility, included in systematic review, and, if applicable, included in the meta-analysis).                                                                                                                                                   | 5, see Search and Selection                            |
| Data collection process            | 10 | Describe method of data extraction from reports (e.g., piloted forms, independently, in duplicate) and any processes for obtaining and confirming data from investigators.                                                                                                                                  | 6-7, see Data-extraction                               |
| Data items                         | 11 | List and define all variables for which data were sought (e.g., PICOS, funding sources) and any assumptions and simplifications made.                                                                                                                                                                       | 6-7, see Data-extraction                               |
| Risk of bias in individual studies | 12 | Describe methods used for assessing risk of bias of individual studies (including specification of whether this was done at the study or outcome level), and how                                                                                                                                            | 7-8<br>- See Quality assessment                        |

|                               |    |                                                                                                                                                                                                          |                                                                                                                                                                                                                      |
|-------------------------------|----|----------------------------------------------------------------------------------------------------------------------------------------------------------------------------------------------------------|----------------------------------------------------------------------------------------------------------------------------------------------------------------------------------------------------------------------|
|                               |    | this information is to be used in any data synthesis.                                                                                                                                                    | and Statistics                                                                                                                                                                                                       |
| Summary measures              | 13 | State the principal summary measures (e.g., risk ratio, difference in means).                                                                                                                            | 7, See Statistics: Cohen's d                                                                                                                                                                                         |
| Synthesis of results          | 14 | Describe the methods of handling data and combining results of studies, if done, including measures of consistency (e.g., $I^2$ ) for each meta-analysis.                                                | 7-8, see Statistics:<br>- $I^2$<br>- Random-effects meta-analysis                                                                                                                                                    |
| Risk of bias across studies   | 15 | Specify any assessment of risk of bias that may affect the cumulative evidence (e.g., publication bias, selective reporting within studies).                                                             | 7-8, see Statistics:<br>- Visual inspection funneplots<br>- Eggers intercept                                                                                                                                         |
| Additional analyses           | 16 | Describe methods of additional analyses (e.g., sensitivity or subgroup analyses, meta-regression), if done, indicating which were pre-specified.                                                         | 7-8, see Statistics:<br>Sensitivity analysis were done to compare outcomes at different domains of neurodevelopment, to compare different types of malformations and to compare evidence of different study quality. |
| <b>RESULTS</b>                |    |                                                                                                                                                                                                          |                                                                                                                                                                                                                      |
| Study selection               | 17 | Give numbers of studies screened, assessed for eligibility, and included in the review, with reasons for exclusions at each stage, ideally with a flow diagram.                                          | 5-6, see Search and Selection; Figure 1                                                                                                                                                                              |
| Study characteristics         | 18 | For each study, present characteristics for which data were extracted (e.g., study size, PICOS, follow-up period) and provide the citations.                                                             | Supplementary Table, sTable 1                                                                                                                                                                                        |
| Risk of bias within studies   | 19 | Present data on risk of bias of each study and, if available, any outcome level assessment (see item 12).                                                                                                | Table 2                                                                                                                                                                                                              |
| Results of individual studies | 20 | For all outcomes considered (benefits or harms), present, for each study: (a) simple summary data for each intervention group (b) effect estimates and confidence intervals, ideally with a forest plot. | Figure 2 / Table 2                                                                                                                                                                                                   |
| Synthesis of results          | 21 | Present results of each meta-analysis done, including confidence intervals and measures of consistency.                                                                                                  | 9-11, described in results section, Table 2                                                                                                                                                                          |
| Risk of bias across studies   | 22 | Present results of any assessment of risk of bias across studies (see Item 15).                                                                                                                          | 12-13                                                                                                                                                                                                                |
| Additional analysis           | 23 | Give results of additional analyses, if done (e.g., sensitivity or subgroup analyses, meta-regression [see Item 16]).                                                                                    | 11-15, Supplementary Table sTable 2                                                                                                                                                                                  |
| <b>DISCUSSION</b>             |    |                                                                                                                                                                                                          |                                                                                                                                                                                                                      |
| Summary of evidence           | 24 | Summarize the main findings including the strength of evidence for each main outcome; consider their relevance to key groups (e.g., healthcare providers, users, and policy makers).                     | 16-17, summary of findings was given in the first part of the discussion                                                                                                                                             |

|                |    |                                                                                                                                                               |                                                    |
|----------------|----|---------------------------------------------------------------------------------------------------------------------------------------------------------------|----------------------------------------------------|
| Limitations    | 25 | Discuss limitations at study and outcome level (e.g., risk of bias), and at review-level (e.g., incomplete retrieval of identified research, reporting bias). | 18, limitations were discussed under “limitations” |
| Conclusions    | 26 | Provide a general interpretation of the results in the context of other evidence, and implications for future research.                                       | 18, see Conclusions                                |
| <b>FUNDING</b> |    |                                                                                                                                                               |                                                    |
| Funding        | 27 | Describe sources of funding for the systematic review and other support (e.g., supply of data); role of funders for the systematic review.                    | N/A                                                |
